# Supplementary material for: Application of natural zeolite adsorption in cooperation with photosynthesis for the post-treatment of microbial fuel cells
Source: Royal Society of Chemistry journal article supplement (doi:10.1039/d4ra04672b), 2024-01-01
Supplement: d4ra04672b1.pdf [file d4ra04672b1.pdf]

**SUPPLEMENTARY INFORMATION**

**Application of natural zeolite adsorption in cooperation with photosynthesis  
for the post-treatment of microbial fuel cells**

Que Nguyen Ho<sup>1</sup>, Taira Hidaka<sup>2</sup>, Mukhlis A Rahman<sup>3</sup>, Naoko Yoshida<sup>1\*</sup>

<sup>1</sup> Department of Civil Engineering, Nagoya Institute of Technology, Nagoya, Japan

<sup>2</sup> Department of Environmental Engineering, Graduate School of Engineering, Kyoto University,  
Kyoto University Katsura, Nishikyo, Kyoto 615-8540, Japan

<sup>3</sup>Advanced Membrane Technology Research Centre (AMTEC), School of Chemical and Energy  
Engineering (FCEE), Universiti Teknologi Malaysia, 81310 UTM Skudai, Johor, Malaysia

## I. The degradation of $\text{NH}_4^+$ following treatment with MFCs

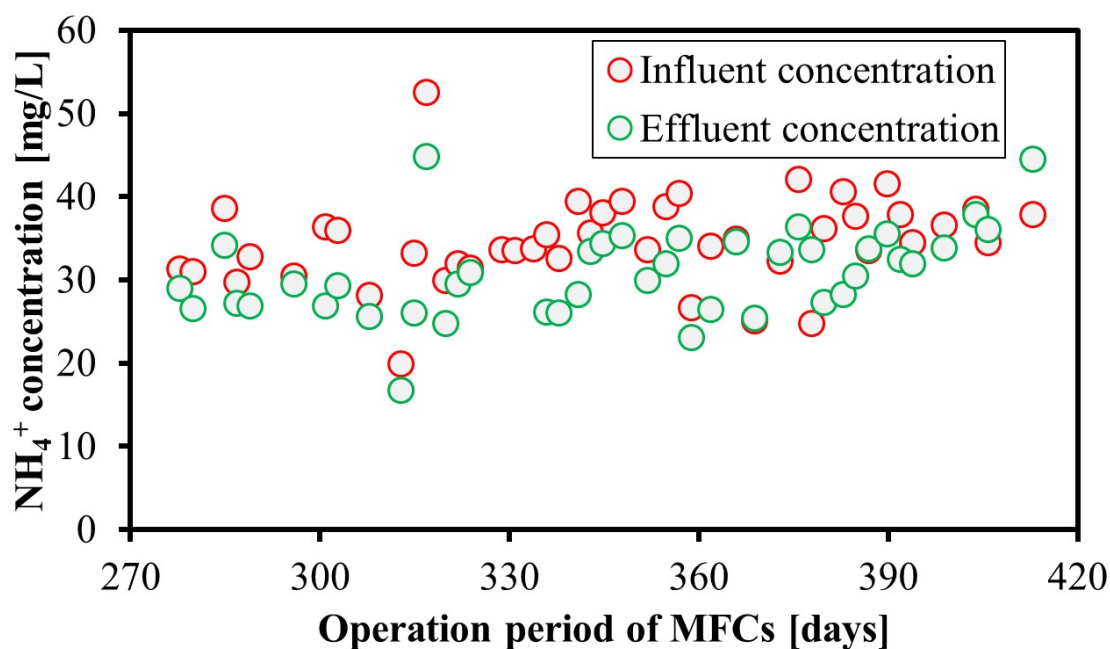

**Fig S1.** The degradation of  $\text{NH}_4^+$  concentration following treatment with MFCs. The influent concentration represented the  $\text{NH}_4^+$  concentration in sewage, while the effluent concentration indicated the  $\text{NH}_4^+$  concentration after treatment with MFCs.

17

18 Fig S1 shows the degradation of  $\text{NH}_4^+$  after MFCs treatment, which coincided with the period  
19 using natural zeolite adsorption and photosynthesis. The average influent concentration of  $\text{NH}_4^+$   
20 was approximately 35.16 mg/L, decreasing to 31.9 mg/L after passing through the MFCs. These  
21 results demonstrated that the MFCs system, which used an anion exchange membrane as a  
22 separator, was not efficient in removing  $\text{NH}_4^+$  from sewage. Therefore, a second step was  
23 necessary for  $\text{NH}_4^+$  removal. The integration of natural zeolite adsorption and photosynthesis  
24 clearly proved to be effective in removing  $\text{NH}_4^+$ , as shown in Fig 4(c1) and 4(c2) of the manuscript.

25

## 26 II. Comparison of $\text{NH}_4^+$ removal efficiency in this study with other reported systems

27 Table S1 presents the most popular combinations of MFCs with other technologies for the removal  
28 of nitrogenous compounds from wastewater. These studies achieved ammonium removal  
29 efficiencies exceeding 75%. Similar to these previous studies, our results demonstrated the  
30 effectiveness of this system in removing ammonium following MFCs treatment. Based on these  
31 review systems, the combination of MFC and membrane produced good output values. However,  
32 this approach raises several operational issues, including high costs, membrane fouling, and  
33 significant energy requirements for processes like air scouring to control bacterial growth on the

membranes (Al-Asheh, Bagheri et al. 2021, Bhattacharya and Banerjee 2023). In contrast, our system showed promise due to its low cost and ease of operation. It utilized natural zeolite, which is abundant and inexpensive (Wang and Peng 2010), and did not require additional energy for operation (e.g., LED lights).

**Table S1. Comparison the  $\text{NH}_4^+$  removal of this study and other reported systems**

| Type of systems              | Ammonium concentration<br>[mg/L] |          | Highest<br>removal-EC<br>[%] | References                   |
|------------------------------|----------------------------------|----------|------------------------------|------------------------------|
|                              | Inf                              | Eff      |                              |                              |
| MFC-Membrane bioreactor      | 32±4.28                          | 0.8±0.41 | 97.7±1.9                     | (Malaeb, Katuri et al. 2013) |
| Regular MFC-Denitrifying MFC | 21.4±10.2                        | 4.9±3.8  | 77                           | (Zhang, Ge et al. 2013)      |
| MFC- FO                      | 780                              | 114.7    | 85.3±3.5                     | (Qin, Hynes et al. 2017)     |
| MFC-CDI                      | 21.4                             | 0.6±0.1  | 97.6                         | (Feng, Tsai et al. 2017)     |
| MFC-AA/O                     | 100-130                          | 16-25    | 80.7-84                      | (Liu, Tursun et al. 2017)    |
| UFCW-MFC                     | 39                               | 3.51     | 91                           | (Oon, Ong et al. 2015)       |
| MFC-ZP                       | 29.6-34.7                        | 10.4-3.1 | 60-84.5                      | This study                   |

Inf: influent concentration; Eff: effluent concentration; EC: efficiency; FO: forward osmotic, CDI: capacitive deionization; AA/O: anaerobic–anoxic–oxic; UFCW-MFC: up-flow constructed wetland-microbial fuel cell; ZP: natural zeolite adsorption integrated with photosynthesis.

## References

55 Al-Asheh, S., et al. (2021). "Membrane bioreactor for wastewater treatment: A review." Case  
56 Studies in Chemical and Environmental Engineering **4**: 100109.

57

58 Bhattacharya, P. and P. Banerjee (2023). Antibacterial and Antifouling Properties of Membranes.  
59 Membranes for Water Treatment and Remediation, Springer: 249-276.

60

61 Feng, C., et al. (2017). "Integrating cost-effective microbial fuel cells and energy-efficient  
62 capacitive deionization for advanced domestic wastewater treatment." Chemical Engineering  
63 Journal **330**: 1-10.

64

65 Liu, R., et al. (2017). "Microbial community dynamics in a pilot-scale MFC-AA/O system treating  
66 domestic sewage." Bioresource Technology **241**: 439-447.

67

68 Malaeb, L., et al. (2013). "A hybrid microbial fuel cell membrane bioreactor with a conductive  
69 ultrafiltration membrane biocathode for wastewater treatment." Environmental science &  
70 technology **47**(20): 11821-11828.

71

72 Oon, Y.-L., et al. (2015). "Hybrid system up-flow constructed wetland integrated with microbial  
73 fuel cell for simultaneous wastewater treatment and electricity generation." Bioresource  
74 Technology **186**: 270-275.

75

76 Qin, M., et al. (2017). "Ammonium removal from synthetic wastewater promoted by current  
77 generation and water flux in an osmotic microbial fuel cell." Journal of cleaner production **149**:  
78 856-862.

79

80 Wang, S. and Y. Peng (2010). "Natural zeolites as effective adsorbents in water and wastewater  
81 treatment." Chemical Engineering Journal **156**(1): 11-24.

82

83 Zhang, F., et al. (2013). "Long-term performance of liter-scale microbial fuel cells treating primary  
84 effluent installed in a municipal wastewater treatment facility." Environmental science &  
85 technology **47**(9): 4941-4948.

86

87
